# Supplementary material for: Degradation analysis of inverted PM6 (PBDB-T-2F):Y7 (BTP-4CI) solar cells with PDINO and MoO3 as the ETL/HTL
Source: Royal Society of Chemistry journal article supplement (doi:10.1039/d3se00977g), 2023-11-15
Supplement: d3se00977g1.pdf [file d3se00977g1.pdf]

## Supporting information

**Table S1** Fitting parameters over time of the equivalent circuit 2 RC Model (inset Figure S1) for devices degraded under dark and N<sub>2</sub> environment.

| Time (h) | L (H)                 | R <sub>1</sub> (Ohm) | R <sub>2</sub> (Ohm) | R <sub>3</sub> (Ohm) | C <sub>1</sub> (nF) | C <sub>2</sub> (nF) |
|----------|-----------------------|----------------------|----------------------|----------------------|---------------------|---------------------|
| 0 h      | 3.22x10 <sup>-7</sup> | 12.33                | 260.90               | 45.58                | 10.64               | 7.14                |
| 504      | 3.22x10 <sup>-7</sup> | 12.33                | 265.50               | 48.71                | 14.57               | 9.70                |
| 2397     | 3.22x10 <sup>-7</sup> | 12.66                | 275.50               | 53.71                | 20.73               | 10.67               |
| 2568     | 3.22x10 <sup>-7</sup> | 12.66                | 297.50               | 54.74                | 21.94               | 11.17               |
| 2712     | 3.22x10 <sup>-7</sup> | 12.66                | 392.00               | 56.95                | 22.37               | 11.20               |
| 3196     | 3.22x10 <sup>-7</sup> | 13.33                | 446.00               | 57.95                | 23.38               | 11.40               |
| 3240     | 3.22x10 <sup>-7</sup> | 13.33                | 465.80               | 59.95                | 26.60               | 11.56               |
| 3432     | 3.22x10 <sup>-7</sup> | 14.17                | 465.80               | 62.56                | 24.12               | 11.73               |
| 3552     | 3.22x10 <sup>-7</sup> | 14.17                | 475.60               | 76.55                | 24.23               | 11.91               |

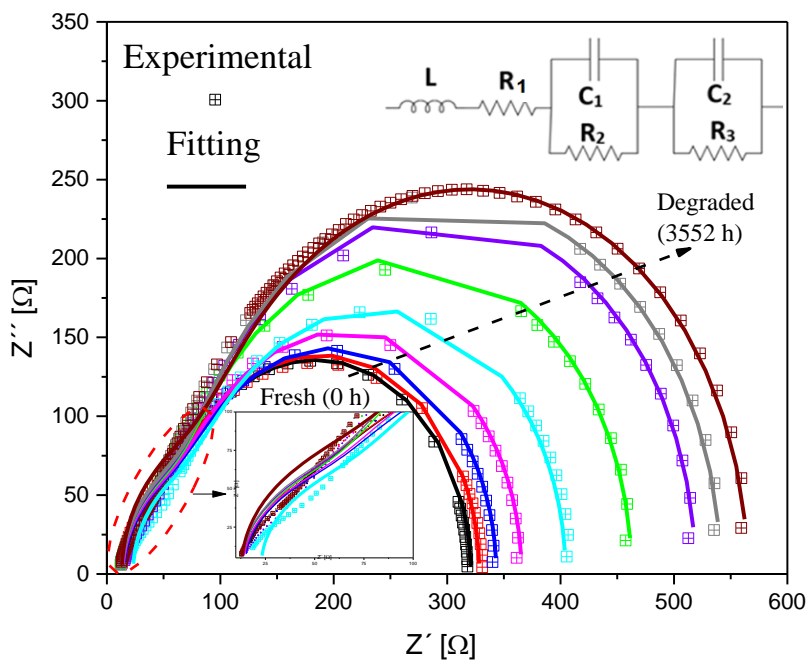

**Figure S1.** Cole-Cole plot at open circuit condition,  $V_{\text{bias}} = 0.78$  V, with frequency range of 1 kHz-2 MHz under dark and an oscillation amplitude of 50 mV. The fits were done using the 2 RC model. It is seen that the adjustment at high frequencies is not good.

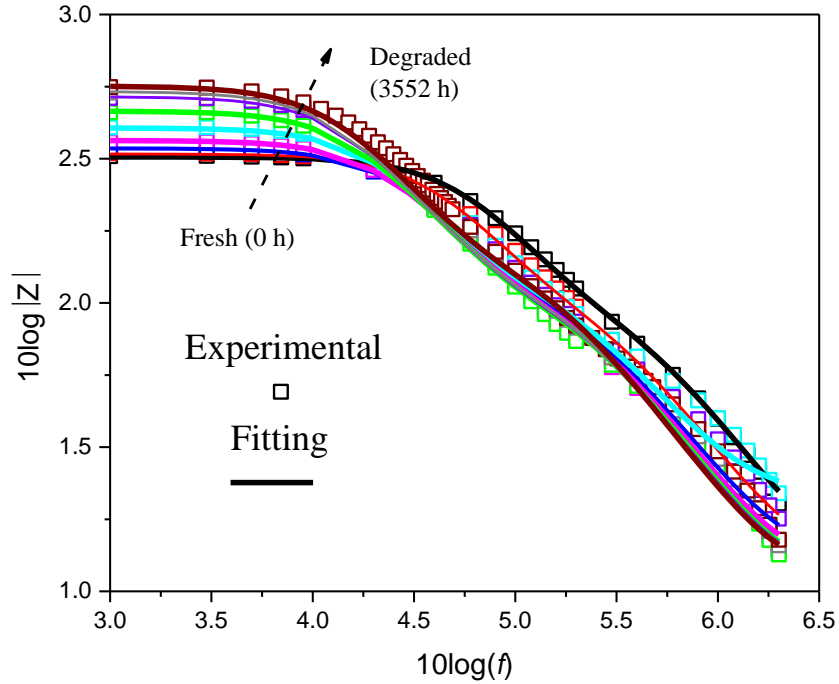

**Figure S2.** The magnitude Bode plot: experimental (symbols) and fitted (lines) values for the measurements over time of the fabricated devices using the 2 RC model. It is seen that the adjustment at high frequencies is not good.

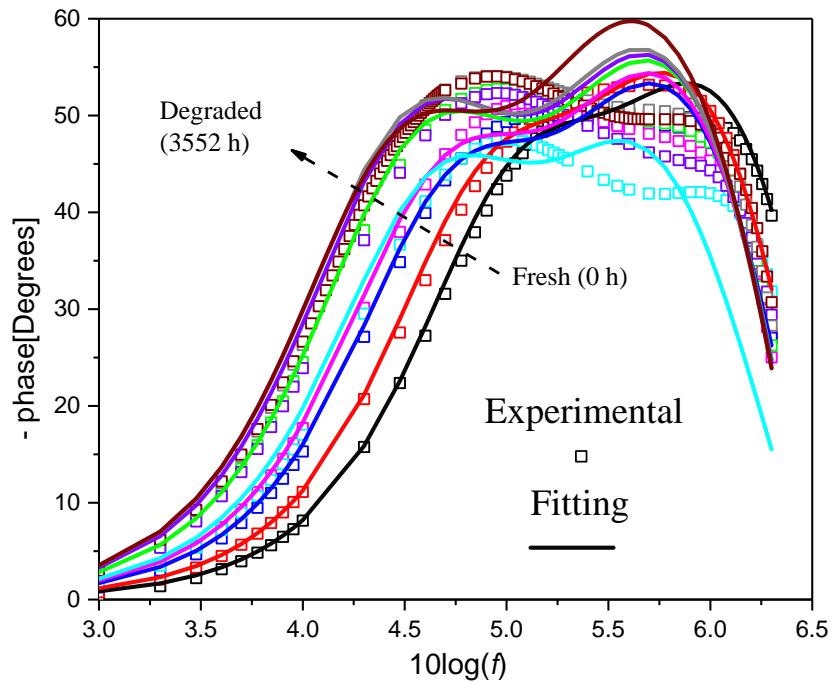

**Figure S3.** The phase Bode plot: experimental (symbols) and fitted (lines) values for the measurements over time of the fabricated devices using the 2 RC model. It is seen that the adjustment at high frequencies is not good.

**Table S2** Fitting parameters over time of the equivalent circuit 3 R-C Model (inset Figure S4) for devices degraded under dark and N<sub>2</sub> environment.

| Time (h) | L (H)                | R <sub>1</sub> (Ohm) | R <sub>2</sub> (Ohm) | R <sub>3</sub> (Ohm) | R <sub>4</sub> (Ohm) | C <sub>1</sub> (F) | C <sub>2</sub> (F) | C <sub>3</sub> (F) |
|----------|----------------------|----------------------|----------------------|----------------------|----------------------|--------------------|--------------------|--------------------|
| 0 h      | 3.1x10 <sup>-7</sup> | 10.84                | 250.70               | 33.40                | 20.23                | 11.44              | 6.55               | 59.00              |
| 504      | 3.1x10 <sup>-7</sup> | 10.84                | 262.00               | 35.42                | 21.41                | 13.49              | 6.97               | 58.22              |
| 2397     | 3.1x10 <sup>-7</sup> | 10.84                | 276.30               | 35.81                | 21.79                | 18.33              | 6.99               | 55.94              |
| 2568     | 3.1x10 <sup>-7</sup> | 10.97                | 291.90               | 36.51                | 28.26                | 20.38              | 7.19               | 54.00              |
| 2712     | 3.1x10 <sup>-7</sup> | 11.25                | 322.00               | 37.34                | 28.51                | 20.85              | 7.22               | 53.42              |
| 3196     | 3.1x10 <sup>-7</sup> | 11.45                | 377.60               | 37.40                | 39.60                | 22.78              | 7.24               | 51.74              |
| 3240     | 3.1x10 <sup>-7</sup> | 11.75                | 406.00               | 40.97                | 57.10                | 22.81              | 7.58               | 49.36              |
| 3432     | 3.1x10 <sup>-7</sup> | 11.95                | 432.70               | 41.54                | 62.36                | 22.98              | 7.95               | 48.58              |
| 3552     | 3.1x10 <sup>-7</sup> | 13.72                | 443.40               | 41.60                | 68.91                | 22.98              | 7.97               | 47.20              |

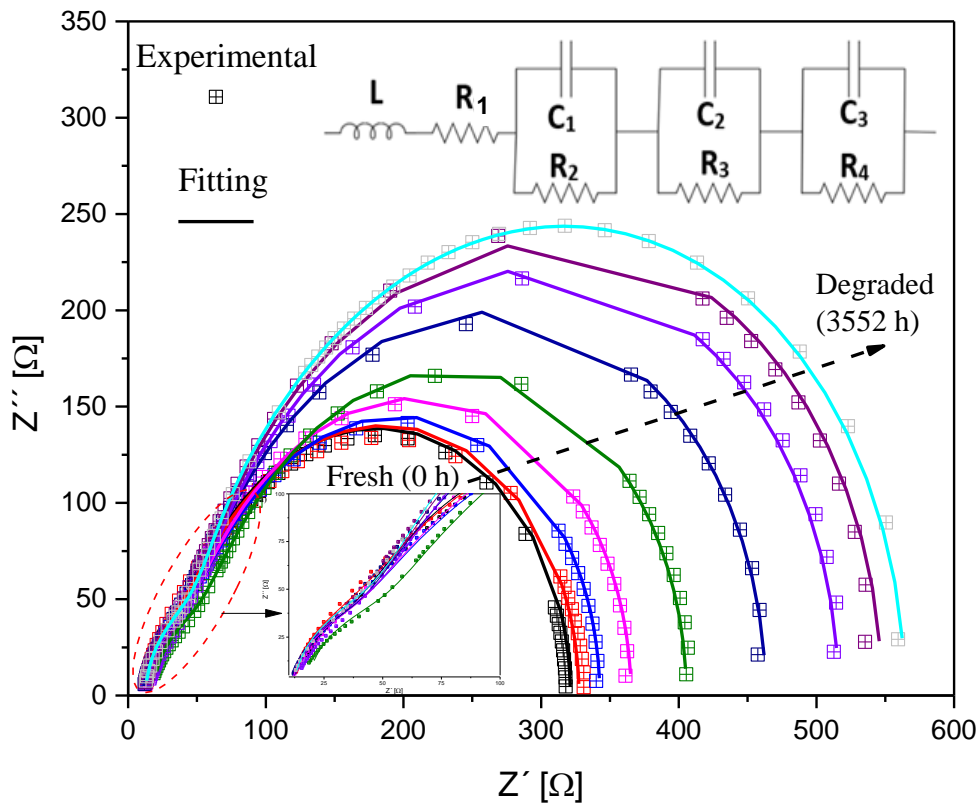

**Figure S4.** Cole-Cole plot (experimental-symbols and fitted-lines) over time at open circuit condition, V<sub>bias</sub>= 0.78 V, frequency range of 1 kHz-2 MHz degraded under dark and N<sub>2</sub> environment and an oscillation amplitude of 50 mV. The fits were done using the 3 RC model. The fitting is good for all the frequency range.

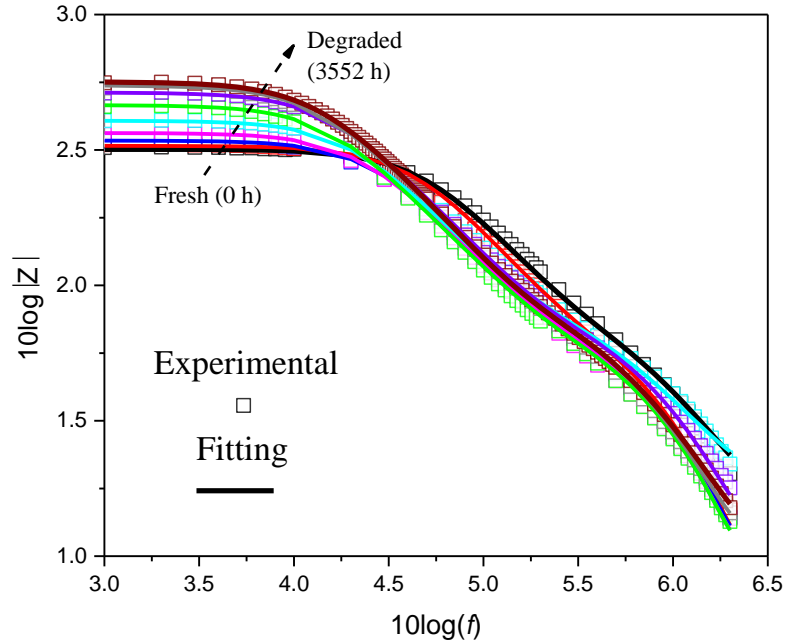

**Figure S5.** The magnitude Bode plot: experimental (symbols) and fitted (lines) values for the measurements over time of the fabricated devices using the 3 RC model. The fitting is good for all the frequency range.

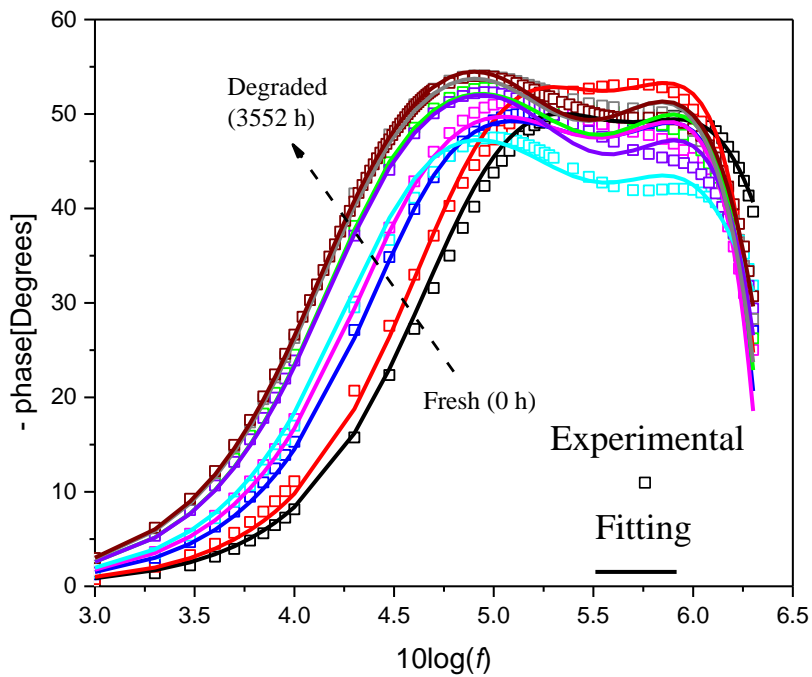

**Figure S6** The phase Bode plot: experimental (symbols) and fitted (lines) values for the measurements over time of the fabricated devices using the 3 RC model. The fitting is good for all the frequency range.
